# Supplementary material for: Characterizing Variation of Branch Angle and Genome-Wide Association Mapping in Rapeseed (Brassica napus L.)
Source: Front Plant Sci. 2016 Feb 4;7:21. doi: 10.3389/fpls.2016.00021 (PMC4740498; doi:10.3389/fpls.2016.00021)
Supplement: Supplementary file 2 [file Table2.XLSX]

## Sheet: Sheet1
Supplementary Table 2. Summary of the PIC values in different linkage groups of B. napus
Linkga group	Number of SNPs	PICa Average						PIC value
			0.05-0.1	0.1-0.15	0.15-0.2	0.2-0.25	0.25-0.3	0.3-0.35	0.35-0.4	0.4-0.45	0.45-0.5	0.5-0.55	0.55-0.6	Marker density(kb)
A01	1868	0.389229	5(0.3%)	45(2.4%)	113(6.1%)	117(6.3%)	121(6.5%)	156(8.6%)	251(13.4%)	473(25.3%)	323(17.3%)	159(8.5%)	105(5.6%)	14.6334
A02	1691	0.371734	3(0.2%)	35(2.1%)	95(5.6%)	103(6.1%)	186(11.0%)	186(11.0%)	360(21.3%)	381(22.5%)	167(9.9%)	107(6.3%)	68(4.0%)	15.3899
A03	2267	0.372145	5(0.2%)	77(3.4%)	86(3.8%)	133(5.9%)	212(9.4%)	287(12.7%)	453(20.0%)	561(24.8%)	247(10.9%)	150(6.6%)	56(2.5%)	13.9112
A04	1541	0.369884	2(0.1%)	39(2.5%)	60(3.9%)	138(9.0%)	131(8.5%)	168(10.9%)	317(20.6%)	402(26.1%)	163(10.6%)	72(4.7%)	48(3.1%)	13.1576
A05	1694	0.369186	6(0.4%)	44(2.6%)	91(5.4%)	112(6.6%)	154(9.1%)	201(11.9%)	366(21.6%)	353(20.8%)	218(12.9%)	84(5.0%)	65(3.8%)	14.0741
A06	1532	0.376291	0(0.0%)	36(2.4%)	64(4.2%)	112(7.3%)	98(6.4%)	159(10.4%)	344(22.5%)	415(27.1%)	203(13.3%)	62(4.1%)	39(2.6%)	16.8739
A07	2093	0.375137	8(0.4%)	51(2.4%)	91(4.4%)	170(8.1%)	166(7.9%)	219(10.5%)	382(18.3%)	543(25.9%)	244(11.7%)	168(8.0%)	51(2.4%)	12.2938
A08	1055	0.325073	3(0.3%)	76(7.2%)	92(8.7%)	116(11.0%)	181(17.2%)	108(10.2%)	147(13.9%)	204(19.3%)	76(7.2%)	36(3.4%)	16(1.5%)	17.6117
A09	2114	0.397245	4(0.2%)	57(2.7%)	74(3.5%)	83(3.9%)	159(7.5%)	204(9.7%)	334(15.8%)	452(21.4%)	493(23.3%)	169(8.0%)	85(4.0%)	18.9693
A10	1212	0.384925	5(0.4%)	46(3.8%)	47(3.9%)	63(5.2%)	85(7.0%)	116(9.6%)	173(14.3%)	332(27.4%)	257(21.2%)	48(4.0%)	40(3.3%)	12.1042
C01	2497	0.347826	21(0.8%)	99(4.0%)	77(3.1%)	221(8.9%)	156(6.3%)	235(9.4%)	1167(46.7%)	274(11.0%)	150(6.0%)	50(2.0%)	47(1.9%)	19.4927
C02	1842	0.364887	2(0.1%)	20(1.1%)	30(1.6%)	106(5.8%)	234(12.7%)	407(22.1%)	329(17.9%)	455(24.7%)	193(10.5%)	45(2.4%)	20(1.1%)	28.1485
C03	2745	0.343416	2(0.1%)	168(6.1%)	158(5.8%)	180(6.6%)	343(12.5%)	387(14.1%)	592(21.6%)	617(22.5%)	193(7.0%)	59(2.2%)	46(1.7%)	26.3931
C04	2542	0.38253	24(0.9%)	85(3.3%)	40(1.6%)	134(5.3%)	135(5.3%)	197(7.8%)	582(22.9%)	899(35.4%)	354(13.9%)	58(2.3%)	34(1.3%)	21.6293
C05	932	0.354589	1(0.1%)	39(4.2%)	43(4.6%)	59(6.3%)	91(9.8%)	163(17.5%)	237(25.4%)	154(16.5%)	108(11.6%)	18(1.9%)	19(2.0%)	47.5703
C06	1892	0.363166	1(0.1%)	101(5.3%)	78(4.1%)	108(5.7%)	96(5.1%)	418(22.1%)	254(13.4%)	369(19.5%)	417(22.0%)	31(1.6%)	19(1.0%)	24.6813
C07	2383	0.359986	1(0.0%)	69(2.9%)	47(1.9%)	203(8.5%)	574(24.1%)	178(7.5%)	274(11.5%)	384(16.1%)	500(21.0%)	129(5.4%)	24(1.0%)	22.562
C08	1407	0.354719	0(0.0%)	34(2.4%)	26(1.9)	250(17.8%)	176(12.5%)	128(9.1%)	238(16.9%)	299(21.3%)	191(13.6%)	43(3.1%)	22(1.6%)	26.5742
C09	1189	0.346482	13(1.1%)	90(7.6%)	35(2.9)	93(7.8%)	80(6.7%)	319(26.8%)	109(9.2%)	181(15.2%)	219(18.4%)	28(2.4%)	22(1.9%)	52.646
aPIC is an abbreviation of polymorphism information content
